# Supplementary material
Source: PubMed Central journal article supplement (PMC3881009)
Supplement: NIHMS434852-supplement-supplementary_data.pdf [file NIHMS434852-supplement-supplementary_data.pdf]

## Myotonic dystrophy mouse models: towards rational therapy development

Mário Gomes-Pereira<sup>1</sup>, Thomas A. Cooper<sup>2</sup>, and Geneviève Gourdon<sup>1</sup>

<sup>1</sup>Inserm U781, Université Paris Descartes, Faculté de Médecine Necker Enfants Malades, Paris, France

Departments of Pathology and Immunology; <sup>2</sup>Molecular and Cellular Biology, Baylor College of Medicine, Houston, USA

Corresponding author: Gomes-Pereira, M (mario.pereira@inserm.fr)

a.

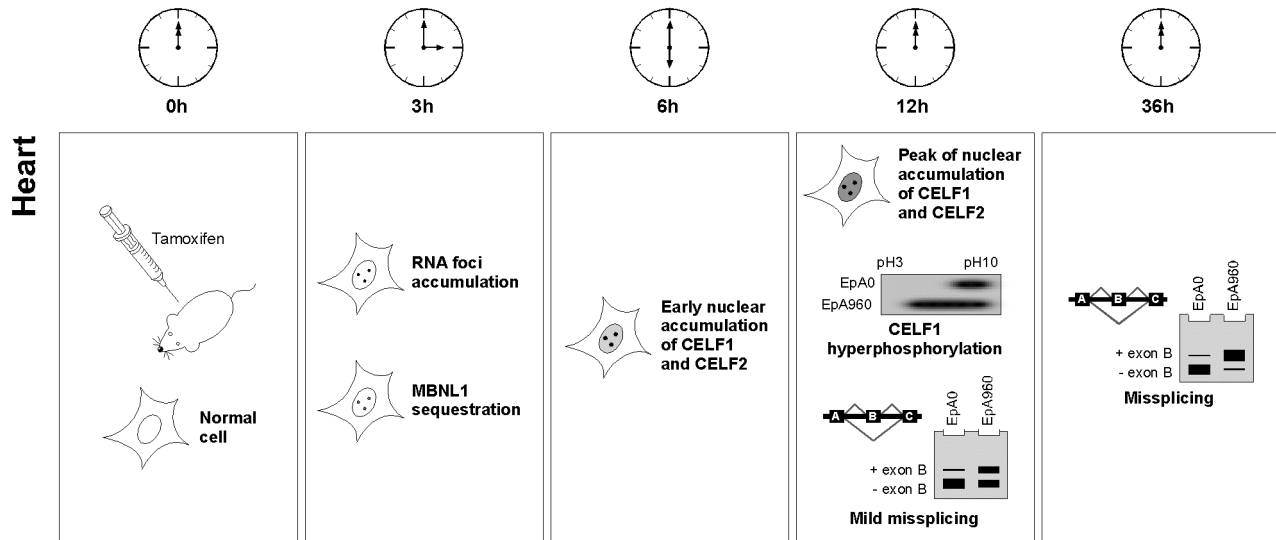

b.

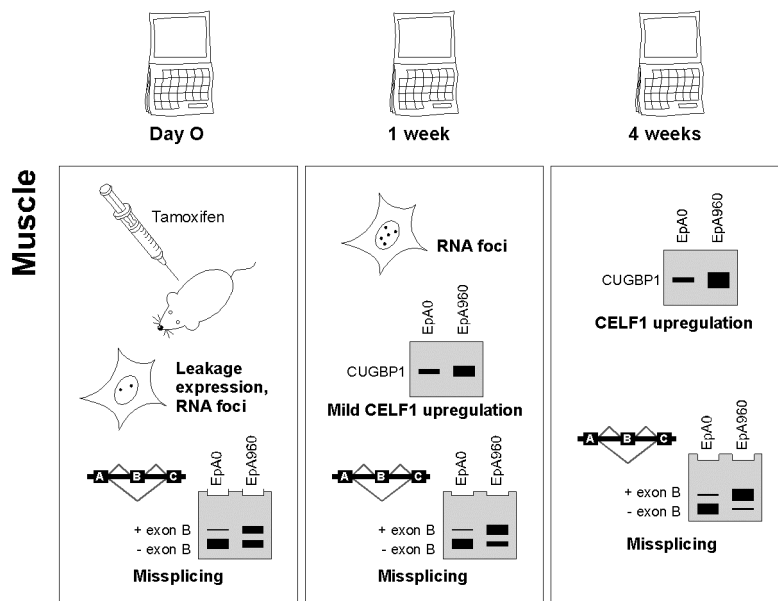

**Figure S1. Foci accumulation dynamics and sequence of molecular events following toxic RNA expression.**

Inducible expression of the transgene allowed a time-course analysis of the molecular events triggered by the expanded CUG repeats in EpA960 heart and skeletal muscle. **(a)** Prior to the induction of transgene expression by tamoxifen administration, mouse heart cells have normal appearance. Three hours following tamoxifen injection CUG-containing RNA foci accumulate in the cell nucleus and sequester muscleblind-like 1 (MBNL1) protein. Increased CUGBP/Elav-like family members 1 (CELF1) and 2 (CELF2) immunofluorescence in the nucleus is first detected six hours following tamoxifen administration and peaks at 12 hours, when CELF1 hyperphosphorylation is detected by two-dimensional electrophoresis. Mild splicing abnormalities are first detected at 12 hours following tamoxifen injection, increasing up to 36 hours. **(b)** Leaky transgene expression in skeletal muscle prior to tamoxifen administration results in foci accumulation and mild splicing defects. CELF1 upregulation is detected one week following tamoxifen injection and increases up to four weeks, paralleling the increasing extent of splicing abnormalities. Splicing abnormalities are detected at four weeks, notably missplicing of CELF1-responsive, but MBNL1-independent transcripts.

**Table S1. Abnormal missplicing events described in DM1 patients and transgenic mouse models in skeletal muscles, heart and CNS.**

| Gene symbol            | Gene name                                                                | HGNC ID | Entrez gene ID | Target                                | Refs.     |
|------------------------|--------------------------------------------------------------------------|---------|----------------|---------------------------------------|-----------|
| <b>Skeletal muscle</b> |                                                                          |         |                |                                       |           |
| <i>ATP2A1/SERCA1</i>   | ATPase, Ca++ transporting, cardiac muscle, fast twitch 1                 | 811     | 487            | Exon 22                               | [S1, 2]   |
| <i>CAPN3</i>           | Calpain 3                                                                | 1480    | 825            | Exon 16                               | [S2]      |
| <i>CLCN1</i>           | Chloride channel 1, skeletal muscle                                      | 2019    | 1180           | Intron 2; Exons 7a, 8a                | [S3, 4]   |
| <i>DMD</i>             | Dystrophin                                                               | 2928    | 1756           | Exons 71 and 78                       | [S5]      |
| <i>DTNA</i>            | Dystrobrevin, alpha                                                      | 3057    | 1837           | Exons 11a and 12                      | [S6]      |
| <i>FHOD1</i>           | Formin homology 2 domain containing 1                                    | 17905   | 29109          | Exon 11a                              | [S2]      |
| <i>GFPT1</i>           | Glutamine-fructose-6-phosphate transaminase 1                            | 4241    | 2673           | Exon 10                               | [S2]      |
| <i>INSR</i>            | Insulin receptor                                                         | 6091    | 3643           | Exon 11                               | [S7]      |
| <i>LDB3/CYPHER</i>     | LIM domain binding 3                                                     | 15710   | 11155          | Exon 11                               | [S2]      |
| <i>MBNL1</i>           | Muscleblind-like                                                         | 6923    | 4154           | Exon 7                                | [S2]      |
| <i>MBNL2</i>           | Muscleblind-like                                                         | 16746   | 10150          | Exon 7                                | [S2]      |
| <i>MTMR1</i>           | Myotubularin related protein 1                                           | 7449    | 8776           | Exons 2.1, 2.2                        | [S8]      |
| <i>NRAP</i>            | Nebulin-related anchoring protein                                        | 7988    | 4892           | Exon 12                               | [S2]      |
| <i>PDLIM3</i>          | PDZ and LIM domain 3                                                     | 20767   | 27295          | Exons 5a, 5b                          | [S2]      |
| <i>RYR1</i>            | Ryanodine receptor 1 (skeletal)                                          | 10483   | 6261           | Exon 70                               | [S1]      |
| <i>TNNT3</i>           | Troponin T type 3 (skeletal, fast)                                       | 11950   | 7140           | Foetal exon                           | [S9]      |
| <i>TTN</i>             | Titin                                                                    | 12403   | 7273           | Z-region Exons 4 and 5; M-line Exon 5 | [S2]      |
| <b>Heart</b>           |                                                                          |         |                |                                       |           |
| <i>KCNAB1</i>          | Potassium voltage-gated channel, shaker-related subfamily, beta member 1 | 6228    | 7881           | Exon 2                                | [S10]     |
| <i>LDB3/CYPHER</i>     | LIM domain binding 3                                                     | 15710   | 11155          | Exon 11                               | [S10]     |
| <i>PDLIM3</i>          | PDZ and LIM domain 3                                                     | 20767   | 27295          | Exon 5                                | [S10]     |
| <i>TNNT2</i>           | Troponin T type 2 (cardiac)                                              | 11949   | 7139           | Exon 5                                | [S11]     |
| <i>TTN</i>             | Titin                                                                    |         |                | M-line Exon 5                         | [S10]     |
| <b>Brain</b>           |                                                                          |         |                |                                       |           |
| <i>APP</i>             | Amyloid beta (A4) precursor protein                                      | 620     | 351            | Exon 7                                | [S12]     |
| <i>GRIN1</i>           | Glutamate receptor, ionotropic, N-methyl D-aspartate 1                   | 4584    | 2902           | Exon 5                                | [S12]     |
| <i>MAPT/TAU</i>        | Microtubule-associated protein tau                                       | 6893    | 4137           | Exons 2, 10                           | [S12, 13] |

**Table S2. Histological, molecular and physiological abnormalities found in transgenic mouse models of DM1.**

| Histopathology <sup>a</sup>                                                                                                  |                                                                                                                                                                                             | Molecular phenotype <sup>a</sup>       | Physiological and functional phenotype <sup>a</sup>                                                                                        | Repeat dynamics <sup>a</sup> | Refs.     |
|------------------------------------------------------------------------------------------------------------------------------|---------------------------------------------------------------------------------------------------------------------------------------------------------------------------------------------|----------------------------------------|--------------------------------------------------------------------------------------------------------------------------------------------|------------------------------|-----------|
| <b>Dmpk KO (B. Wieringa)</b>                                                                                                 |                                                                                                                                                                                             |                                        |                                                                                                                                            |                              |           |
| Transgene expression <sup>b</sup> : Knock-out.<br>Genetic background <sup>b</sup> : 50% C57BL/6 x 129/Ola                    |                                                                                                                                                                                             |                                        |                                                                                                                                            |                              |           |
| Skeletal muscle                                                                                                              | <b>Late and mild head and neck myopathy.</b><br>Clustered small-sized fibres.                                                                                                               | Abnormal Ca <sup>2+</sup> homeostasis. | Normal EMG.                                                                                                                                | Not applicable               | [S14]     |
| <b>Dmpk KO (S. Reddy)</b>                                                                                                    |                                                                                                                                                                                             |                                        |                                                                                                                                            |                              |           |
| Transgene expression: Knock-out.<br>Genetic background: C57BL/6 x 129/Sv                                                     |                                                                                                                                                                                             |                                        |                                                                                                                                            |                              |           |
| Skeletal muscle                                                                                                              | Late and <b>progressive myopathy.</b><br><b>Changes in fibre size.</b><br><b>Altered mitochondria morphology.</b><br><b>Myofibre degeneration and regeneration.</b>                         | High expression of MyoD and eMHC.      | <b>Decline in force generation.</b><br>Abnormal Na <sup>+</sup> currents.                                                                  | Not applicable               | [S15]     |
| Heart                                                                                                                        |                                                                                                                                                                                             |                                        | <b>Progressive cardiac conduction defects.</b><br><b>First, second and third degree heart block.</b><br>Abnormal Na <sup>+</sup> currents. |                              |           |
| <b>Six5 KO (S. Reddy)</b>                                                                                                    |                                                                                                                                                                                             |                                        |                                                                                                                                            |                              |           |
| Transgene expression: Knock-out.<br>Genetic background: 129/Sv or C57BL/6J x 129/Sv                                          |                                                                                                                                                                                             |                                        |                                                                                                                                            |                              |           |
| Heart                                                                                                                        |                                                                                                                                                                                             |                                        | <b>Mild cardiac conduction defects.</b>                                                                                                    | Not applicable               | [S16]     |
| Eye                                                                                                                          | Lenticular cataracts.                                                                                                                                                                       | High Atp1a1 expression.                |                                                                                                                                            |                              |           |
| Testes                                                                                                                       | <b>Progressive reduction in testicular mass.</b><br><b>Leydig cell hyperproliferation.</b><br>Spermatogenic cell apoptosis.                                                                 |                                        | <b>Male sterility.</b>                                                                                                                     |                              |           |
| <b>Six5 KO (S. Tapscott)</b>                                                                                                 |                                                                                                                                                                                             |                                        |                                                                                                                                            |                              |           |
| Transgene expression: Knock-out.<br>Genetic background: C57BL/6                                                              |                                                                                                                                                                                             |                                        |                                                                                                                                            |                              |           |
| Eye                                                                                                                          | Lenticular cataracts                                                                                                                                                                        |                                        |                                                                                                                                            | Not applicable               | [S17]     |
| <b>Tg26 (B. Wieringa)</b>                                                                                                    |                                                                                                                                                                                             |                                        |                                                                                                                                            |                              |           |
| Transgene expression: Multisystemic; driven by the human <i>DMPK</i> gene promoter.<br>Genetic background: C57BL/6 x 129/Ola |                                                                                                                                                                                             |                                        |                                                                                                                                            |                              |           |
| Skeletal muscle                                                                                                              | <b>Progressive myopathy.</b><br><b>Centronucleated fibres.</b><br><b>Changes in fibre size.</b><br><b>Ringed fibres.</b><br>Cytoskeleton disorganisation.<br><b>Reduced CLCN1 staining.</b> |                                        | <b>Deficit in workload tolerance.</b><br><b>Walking difficulties.</b><br><b>Myotonic discharges.</b>                                       | Not reported                 | [S14, 18] |
| Heart                                                                                                                        | <b>Hyperthyroid cardiomyopathy.</b><br>Local myocard whorling.<br>Myofibrillar degeneration.<br><b>Distorted morphology of mitochondria and nuclei.</b>                                     | Abnormal Ca <sup>2+</sup> homeostasis. | Ventricular arrhythmia and dysrhythmia.<br><b>Depressed systemic, systolic and diastolic arterial pressure.</b>                            |                              |           |
| Other organs and systems                                                                                                     |                                                                                                                                                                                             |                                        | Illness during pregnancy and after delivery.                                                                                               |                              |           |

**Table S2. (continued)**

| Histopathology <sup>a</sup>                                                                                                                                                                |                                                                                                                                                                                         | Molecular phenotype <sup>a</sup>                                                                                                                                                                      | Physiological and functional phenotype <sup>a</sup>                                                                                                                                                                                 | Repeat dynamics <sup>a</sup>                                                   | Refs.                       |
|--------------------------------------------------------------------------------------------------------------------------------------------------------------------------------------------|-----------------------------------------------------------------------------------------------------------------------------------------------------------------------------------------|-------------------------------------------------------------------------------------------------------------------------------------------------------------------------------------------------------|-------------------------------------------------------------------------------------------------------------------------------------------------------------------------------------------------------------------------------------|--------------------------------------------------------------------------------|-----------------------------|
| <b>HSA<sup>LR</sup> (C. Thornton)</b>                                                                                                                                                      |                                                                                                                                                                                         |                                                                                                                                                                                                       |                                                                                                                                                                                                                                     |                                                                                |                             |
| Transgene expression: Skeletal muscle and neuromuscular junction; driven by the human skeletal actin (HSA) gene promoter.<br>Genetic background: FVB/N                                     |                                                                                                                                                                                         |                                                                                                                                                                                                       |                                                                                                                                                                                                                                     |                                                                                |                             |
| Skeletal muscle                                                                                                                                                                            | <b>Myopathy.</b><br><b>Centronucleated fibres.</b><br><b>Ringed fibres.</b><br><b>Changes in fibre size.</b><br><b>Reduced CLCN1 immunostaining.</b>                                    | <b>Nuclear RNA foci.</b><br><b>MBNL1 sequestration,</b> but normal CELF1 levels.<br><b>Missplicing</b> (e.g. <i>Atp2a1</i> , <i>Atp2a2</i> , <i>Clcn1</i> , <i>Mbnl1</i> , <i>Ttn</i> , <i>Zasp</i> ) | <b>Myotonia.</b><br><b>Reduced CLCN1 currents.</b><br>High mortality.                                                                                                                                                               | Not reported                                                                   | [S19]                       |
| <b>DM300 and/or DMSXL (G. Gourdon)</b>                                                                                                                                                     |                                                                                                                                                                                         |                                                                                                                                                                                                       |                                                                                                                                                                                                                                     |                                                                                |                             |
| Transgene expression: Multisystemic; driven by the human <i>DMPK</i> gene promoter.<br>Genetic background: DM300, C57BL/6; DMSXL: C57BL6/129/Ola/FVB                                       |                                                                                                                                                                                         |                                                                                                                                                                                                       |                                                                                                                                                                                                                                     |                                                                                |                             |
| Skeletal muscle                                                                                                                                                                            | <b>Centronucleated fibres.</b><br><b>Changes in fibre size and types.</b><br>Late <b>atrophy of muscle.</b><br>Abnormalities in diaphragm neuromuscular junctions and phrenic nerves.   | <b>Nuclear RNA foci.</b><br><b>Missplicing</b> (e.g. <i>Insr</i> , <i>Ttn</i> , <i>Ryr1</i> ...)                                                                                                      | Mild <b>myotonia.</b><br><b>Progressive muscle weakness.</b><br><b>Reduction of the maximal specific tetanic force in the TA.</b><br><b>Impaired muscle strength and motor performance</b> (grip test, wheel test, treadmill test). | <b>Expansion-biased, tissue-specific, age-dependent somatic mosaicism.</b>     | [S20-24] (unpublished data) |
| Heart                                                                                                                                                                                      |                                                                                                                                                                                         | <b>Nuclear RNA foci.</b><br><b>Missplicing</b> (e.g. <i>Ldb3</i> , <i>TnnT2</i> )                                                                                                                     | <b>Conduction abnormalities.</b>                                                                                                                                                                                                    |                                                                                |                             |
| CNS                                                                                                                                                                                        |                                                                                                                                                                                         | <b>Nuclear RNA foci.</b><br><b>Missplicing</b> (e.g. <i>App</i> , <i>Grin1</i> , <i>Mapt</i> , <i>Mbnl1</i> , <i>Mbnl2</i> ).<br><b>Tauopathy.</b>                                                    | <b>Electrophysiological abnormalities.</b>                                                                                                                                                                                          |                                                                                |                             |
| Other organs and systems                                                                                                                                                                   |                                                                                                                                                                                         | <b>Nuclear RNA foci and missplicing</b> (e.g. <i>Insr</i> ) <b>in multiple tissues</b> (e.g. pancreas, liver, adipose tissue).                                                                        | Reduced body size.<br>Increased mortality.<br>Basal hyperglycemia and glucose intolerance.<br>High mortality.                                                                                                                       | <b>Expansion-biased, age- and sex-dependent intergenerational instability.</b> |                             |
| <b>EpA960 (T. Cooper)</b>                                                                                                                                                                  |                                                                                                                                                                                         |                                                                                                                                                                                                       |                                                                                                                                                                                                                                     |                                                                                |                             |
| Transgene expression: Conditional and tissue-specific; driven by a CMV enhancer, <i>β-actin</i> gene promoter; and Cre/loxP inducible system; leaky expression.<br>Genetic background: FVB |                                                                                                                                                                                         |                                                                                                                                                                                                       |                                                                                                                                                                                                                                     |                                                                                |                             |
| Skeletal muscle                                                                                                                                                                            | <b>Progressive myopathy.</b><br><b>Centronucleated fibres.</b><br><b>Changes in fibre size.</b><br><b>Fibrosis.</b><br><b>Myofibre degeneration.</b><br>Necrosis.<br>Basophilic fibres. | <b>Nuclear RNA foci.</b><br><b>MBNL1 sequestration.</b><br><b>CELF1 upregulation.</b><br><b>Missplicing</b> (e.g. <i>Atp2a1</i> , <i>Clcn1</i> , <i>Ldb3</i> )                                        | <b>Myotonia.</b><br><b>Muscle wasting.</b><br><b>Impaired muscle function</b> (assessed by graded treadmill).<br>High mortality.                                                                                                    | Not reported                                                                   | [S25-27]                    |
| Heart                                                                                                                                                                                      | <b>Dilated cardiomyopathy.</b><br>Irregular nuclei.<br>Mitochondria proliferation.                                                                                                      | <b>Nuclear RNA foci.</b><br><b>MBNL1 sequestration.</b><br><b>CELF1 hyperphosphorylation and upregulation.</b><br><b>Missplicing</b> (e.g. <i>Tnnt2</i> , <i>Fxr1</i> ).<br>PKC activation.           | <b>Prolonged PR and QRS intervals.</b><br><b>Heart block.</b><br><b>Systolic and diastolic dysfunction.</b><br>High mortality.                                                                                                      |                                                                                |                             |

**Table S2. (continued)**

| Histopathology <sup>a</sup>                                                                                                                                                    |                                                                                                                                                    | Molecular phenotype <sup>a</sup>                                                                                               | Physiological and functional phenotype <sup>a</sup>                                                            | Repeat dynamics <sup>a</sup> | Refs.    |
|--------------------------------------------------------------------------------------------------------------------------------------------------------------------------------|----------------------------------------------------------------------------------------------------------------------------------------------------|--------------------------------------------------------------------------------------------------------------------------------|----------------------------------------------------------------------------------------------------------------|------------------------------|----------|
| <b>GFP-DMPK-(CTG)<sub>5</sub> (M. Mahadevan)</b>                                                                                                                               |                                                                                                                                                    |                                                                                                                                |                                                                                                                |                              |          |
| Transgene expression: Conditional, tissue-specific, driven by the <i>DMPK</i> gene promoter and tetracycline responsive elements; leaky expression.<br>Genetic background: FVB |                                                                                                                                                    |                                                                                                                                |                                                                                                                |                              |          |
| Skeletal muscle                                                                                                                                                                | <b>Myopathy.</b><br><b>Centronucleated fibres.</b><br>Nuclear clustering.<br><b>Changes in fibre size.</b><br><b>Reduced CLCN1 immunostaining.</b> | Absence of RNA foci.<br><b>CELF1 upregulation.</b><br>Modest missplicing ( <i>e.g. Clcn1, Tnnt3</i> ).<br>NKX2-5 upregulation. | <b>Myotonia.</b>                                                                                               | Not reported                 | [S28]    |
| Heart                                                                                                                                                                          | No signs of cardiomyopathy.                                                                                                                        | Absence of RNA foci.<br>Absence of splicing defects.<br>NKX2-5 upregulation.                                                   | <b>Cardiac conduction defects.</b><br><b>Prolonged PR intervals.</b><br><b>Heart block.</b><br>High mortality. | Not reported                 |          |
| <b>DMPK-GFP-(CTG)<sub>11</sub>, DMPK-GFP-(CTG)<sub>91</sub> (R. Korneluk)</b>                                                                                                  |                                                                                                                                                    |                                                                                                                                |                                                                                                                |                              |          |
| Transgene expression: Multisystemic; driven by the human <i>DMPK</i> gene promoter.<br>Genetic background: C57BL/6                                                             |                                                                                                                                                    |                                                                                                                                |                                                                                                                |                              |          |
| Skeletal muscle                                                                                                                                                                | <b>Myofibrillar atrophy.</b><br>Developmental defects.                                                                                             |                                                                                                                                |                                                                                                                | Not reported                 | [S29]    |
| <b>Mbn1<sup>A3/A3</sup> (M. Swanson)</b>                                                                                                                                       |                                                                                                                                                    |                                                                                                                                |                                                                                                                |                              |          |
| Transgene expression: Knock-out.<br>Genetic background: 129/Sv                                                                                                                 |                                                                                                                                                    |                                                                                                                                |                                                                                                                |                              |          |
| Skeletal muscle                                                                                                                                                                | <b>Centronucleated fibres.</b><br><b>Splitting of myofibres.</b><br><b>Reduced CLCN1 immunostaining.</b>                                           | <b>Missplicing</b> ( <i>e.g. Atp2a1, Clcn1, Lbd3, Mbn1, Tnnt3</i> ).                                                           | <b>Myotonia.</b><br><b>Reduced CLCN1 currents.</b>                                                             | Not applicable               | [S9, 30] |
| Heart                                                                                                                                                                          | <b>Fibrosis.</b>                                                                                                                                   | <b>Missplicing.</b>                                                                                                            | <b>Cardiac conduction defects.</b>                                                                             |                              |          |
| CNS                                                                                                                                                                            |                                                                                                                                                    |                                                                                                                                | Apathy and reduced motivation.                                                                                 |                              |          |
| Eye                                                                                                                                                                            | <b>Subcapsular iridescent cataracts.</b>                                                                                                           |                                                                                                                                |                                                                                                                |                              |          |
| <b>Mbn2 KO (F. Chen)</b>                                                                                                                                                       |                                                                                                                                                    |                                                                                                                                |                                                                                                                |                              |          |
| Transgene expression: Knock-out.<br>Genetic background: 129/Ola x C57BL/6J                                                                                                     |                                                                                                                                                    |                                                                                                                                |                                                                                                                |                              |          |
| Skeletal muscle                                                                                                                                                                | <b>Reduced CLCN1 immunostaining.</b><br><b>Centronucleated fibres.</b><br><b>Changes in fibre size.</b><br><b>Fibrosis.</b>                        | <b>Missplicing.</b>                                                                                                            | <b>Myotonia.</b><br><b>Impairment in motor activity.</b><br>Spinal curvature and lordosis.                     | Not applicable               | [S31]    |
| <b>Mbn2 KO (C. Thornton)</b>                                                                                                                                                   |                                                                                                                                                    |                                                                                                                                |                                                                                                                |                              |          |
| Transgene expression: Knock-out.<br>Genetic background: C57BL/6 x 129                                                                                                          |                                                                                                                                                    |                                                                                                                                |                                                                                                                |                              |          |
| Skeletal muscle                                                                                                                                                                | Normal muscle histology.                                                                                                                           | Normal splicing.                                                                                                               | No myotonia.                                                                                                   | Not applicable               | [S2]     |
| <b>CUGBP1-TR (L. Timtchenko)[S32]</b>                                                                                                                                          |                                                                                                                                                    |                                                                                                                                |                                                                                                                |                              |          |
| Transgene expression: Multisystemic; driven by human <i>CELF1</i> gene promoter and CMV enhancer.<br>Genetic background: FVB                                                   |                                                                                                                                                    |                                                                                                                                |                                                                                                                |                              |          |
| Skeletal muscle                                                                                                                                                                | <b>Changes in fibre size and content.</b><br><b>Centronucleated fibres.</b>                                                                        | Increased levels of p21 and MEF2A.                                                                                             | <b>Reduced muscle size.</b>                                                                                    | Not applicable               |          |
| Other organs and systems                                                                                                                                                       |                                                                                                                                                    |                                                                                                                                | Reduction in body weight.<br>High mortality.                                                                   | Not applicable               |          |

**Table S2. (continued)**

| Histopathology <sup>a</sup>                                                                                                                                                                                 | Molecular phenotype <sup>a</sup>                                                             | Physiological and functional phenotype <sup>a</sup>                                  | Repeat dynamics <sup>a</sup>                                                                                                                                                   | Refs.                                                                                                                                                |
|-------------------------------------------------------------------------------------------------------------------------------------------------------------------------------------------------------------|----------------------------------------------------------------------------------------------|--------------------------------------------------------------------------------------|--------------------------------------------------------------------------------------------------------------------------------------------------------------------------------|------------------------------------------------------------------------------------------------------------------------------------------------------|
| <b>MCKCUG-BP1 (T. Cooper)</b>                                                                                                                                                                               |                                                                                              |                                                                                      |                                                                                                                                                                                |                                                                                                                                                      |
| Transgene expression: Skeletal muscle and heart; driven by mouse creatine kinase (MCK) gene promoter and enhancer.<br>Genetic background: FVB                                                               |                                                                                              |                                                                                      |                                                                                                                                                                                |                                                                                                                                                      |
| Skeletal muscle                                                                                                                                                                                             | <b>Centronucleated fibres.</b><br><b>Changes in fibre size.</b><br>Irregular nuclear shape.  | <b>Missplicing</b> (e.g. <i>Clcn1</i> , <i>Mtmt1</i> ).                              |                                                                                                                                                                                | Not applicable                                                                                                                                       |
| Heart                                                                                                                                                                                                       | Normal heart histology.                                                                      | <b>Missplicing</b> (e.g. <i>Mtmt1</i> , <i>Tnnt2</i> ).                              |                                                                                                                                                                                | [S33]                                                                                                                                                |
| Other organs and systems                                                                                                                                                                                    |                                                                                              |                                                                                      | Stillborn death.                                                                                                                                                               |                                                                                                                                                      |
| <b>TRECUGBP1 (T. Cooper)</b>                                                                                                                                                                                |                                                                                              |                                                                                      |                                                                                                                                                                                |                                                                                                                                                      |
| Transgene expression: Conditional and tissue-specific; driven by minimal CMV promoter and tetracycline-responsive element.<br>Genetic background: FVB                                                       |                                                                                              |                                                                                      |                                                                                                                                                                                |                                                                                                                                                      |
| Skeletal muscle                                                                                                                                                                                             | <b>Centronucleated fibres.</b><br><b>Changes in fibre size.</b><br><b>Myofibre atrophy.</b>  | <b>Missplicing</b> (e.g. <i>Serca1</i> , <i>Ryr1</i> , <i>Mtmt1</i> , <i>Lbd3</i> ). | <b>Reduction in muscle weight and muscle function</b> (treadmill assay).                                                                                                       | Not applicable                                                                                                                                       |
| Heart                                                                                                                                                                                                       | <b>Hypertrophy.</b><br><b>Fibre degeneration.</b><br>Necrosis.<br>Loss of myocardial fibres. | <b>Missplicing</b> (e.g. <i>Atp2a1</i> , <i>Clcn1</i> , <i>Lbd3</i> ).               | <b>Conduction abnormalities.</b><br><b>Prolonged PR interval and QRS complex.</b><br><b>Systolic dysfunction</b> and ventricular dilation.<br>High mortality within two weeks. | [S34, 35]                                                                                                                                            |
| Other organs and systems                                                                                                                                                                                    |                                                                                              |                                                                                      | Reduction in body weight.<br>Decreased movement and abnormal gait.<br>Poor grooming.                                                                                           |                                                                                                                                                      |
| <b>Dmt-D (D. Monckton)</b>                                                                                                                                                                                  |                                                                                              |                                                                                      |                                                                                                                                                                                |                                                                                                                                                      |
| Transgene expression: Fortuitous expression in multiple tissues; driven by an unidentified mouse gene promoter.<br>Genetic background: FVB                                                                  |                                                                                              |                                                                                      |                                                                                                                                                                                |                                                                                                                                                      |
| Kidney<br>Liver<br>Striatum<br>(...)                                                                                                                                                                        |                                                                                              |                                                                                      |                                                                                                                                                                                | <b>Expansion-biased, tissue-specific, age-dependent somatic mosaicism.</b>                                                                           |
| Other organs and systems                                                                                                                                                                                    |                                                                                              |                                                                                      |                                                                                                                                                                                | <b>Expansion-biased, age- and sex-dependent intergenerational instability.</b>                                                                       |
| <b>Dmpk(CTG)84 (B. Wieringa)</b>                                                                                                                                                                            |                                                                                              |                                                                                      |                                                                                                                                                                                |                                                                                                                                                      |
| Transgene expression: Multisystemic; driven by the murine <i>Dmpk</i> gene promoter.<br>Genetic background: C57BL/6 x 129/Ola; C57BL/6 x 129/Ola x Balb/C; C57BL/6 x 129/Ola x FVB; C57BL/6 x 129/Ola x C3H |                                                                                              |                                                                                      |                                                                                                                                                                                |                                                                                                                                                      |
| Kidney<br>Stomach<br>Small intestine<br>Brain<br>Eyes<br>(...)                                                                                                                                              |                                                                                              |                                                                                      |                                                                                                                                                                                | <b>Expansion-biased, tissue- and cell-specific, age-dependent somatic mosaicism</b> , influenced by mouse genetic background and genetic polyploidy. |
| Other organs and systems                                                                                                                                                                                    |                                                                                              |                                                                                      |                                                                                                                                                                                | <b>Expansion-biased, genetic-background-dependent intergenerational instability.</b>                                                                 |

**Table S2. (continued)**

| Histopathology <sup>a</sup>                                                                                  |                                                                  | Molecular phenotype <sup>a</sup>                 | Physiological and functional phenotype <sup>a</sup>                          | Repeat dynamics <sup>a</sup> | Refs.                         |
|--------------------------------------------------------------------------------------------------------------|------------------------------------------------------------------|--------------------------------------------------|------------------------------------------------------------------------------|------------------------------|-------------------------------|
| <b>Znf9<sup>+/-</sup> (Y.-P. Li)</b><br>Transgene expression: Knock-out.<br>Genetic background: C57BL/6J     |                                                                  |                                                  |                                                                              |                              |                               |
| Skeletal muscle                                                                                              | <b>Centronucleated fibres. Changes in fibre size.</b>            | Reduced <i>Cln1</i> mRNA levels.                 | Myotonia.                                                                    | Not applicable               | [S39, 40]                     |
| Heart                                                                                                        | <b>Myocardial hypertrophy. Centronucleated fibres. Fibrosis.</b> |                                                  | <b>Conduction abnormalities. Cardiac arrhythmias. Prolonged PR interval.</b> |                              |                               |
| Other organs and systems                                                                                     | Ocular cataracts.                                                |                                                  | Gait abnormalities.                                                          |                              |                               |
| <b>DM2-HSAtg (R. Krahe)</b><br>Transgene expression: Driven by the human skeletal actin (HSA) gene promoter. |                                                                  |                                                  |                                                                              |                              |                               |
| Skeletal muscle.                                                                                             | <b>Myopathy.</b>                                                 | <b>RNA foci.</b><br>Absence of splicing defects. | <b>Muscle weakness.</b>                                                      | Not reported                 | [S41] (R. Krahe, unpublished) |
| Other organs and systems                                                                                     |                                                                  | CELF1 upregulation in liver.                     |                                                                              |                              |                               |

- a. A summary of histopathological findings, molecular abnormalities and physiological phenotypes are described, as well as features of CTG trinucleotide repeat instability. Mouse phenotypes that have closely and consistently mimicked aspects of the human disease are represented in bold.
- b. For each DM1 transgenic mouse line a summary of the transgene expression pattern and mouse strain background is presented.

#### Supplementary references

- S1 Kimura, T., *et al.* (2005) Altered mRNA splicing of the skeletal muscle ryanodine receptor and sarcoplasmic/endoplasmic reticulum Ca<sup>2+</sup>-ATPase in myotonic dystrophy type 1. *Hum Mol Genet* 14, 2189-2200
- S2 Lin, X., *et al.* (2006) Failure of MBNL1-dependent post-natal splicing transitions in myotonic dystrophy. *Hum Mol Genet* 15, 2087-2097
- S3 Charlet, B.N., *et al.* (2002) Loss of the muscle-specific chloride channel in type 1 myotonic dystrophy due to misregulated alternative splicing. *Mol Cell* 10, 45-53
- S4 Mankodi, A., *et al.* (2002) Expanded CUG repeats trigger aberrant splicing of CIC-1 chloride channel pre-mRNA and hyperexcitability of skeletal muscle in myotonic dystrophy. *Mol Cell* 10, 35-44
- S5 Nakamori, M., *et al.* (2007) Altered mRNA splicing of dystrophin in type 1 myotonic dystrophy. *Muscle Nerve* 36, 251-257
- S6 Nakamori, M., *et al.* (2008) Aberrantly spliced alpha-dystrobrevin alters alpha-syntrophin binding in myotonic dystrophy type 1. *Neurology* 70, 677-685
- S7 Savkur, R.S., *et al.* (2001) Aberrant regulation of insulin receptor alternative splicing is associated with insulin resistance in myotonic dystrophy. *Nat Genet* 29, 40-47.
- S8 Buj-Bello, A., *et al.* (2002) Muscle-specific alternative splicing of myotubularin-related 1 gene is impaired in DM1 muscle cells. *Hum Mol Genet* 11, 2297-2307
- S9 Kanadia, R.N., *et al.* (2003) A muscleblind knockout model for myotonic dystrophy. *Science* 302, 1978-1980
- S10 Mankodi, A., *et al.* (2005) Nuclear RNA foci in the heart in myotonic dystrophy. *Circ Res* 97, 1152-1155
- S11 Philips, A.V., *et al.* (1998) Disruption of splicing regulated by a CUG-binding protein in myotonic dystrophy. *Science* 280, 737-741.
- S12 Jiang, H., *et al.* (2004) Myotonic dystrophy type 1 is associated with nuclear foci of mutant RNA, sequestration of muscleblind proteins and deregulated alternative splicing in neurons. *Hum Mol Genet* 13, 3079-3088
- S13 Sergeant, N., *et al.* (2001) Dysregulation of human brain microtubule-associated tau mRNA maturation in myotonic dystrophy type 1. *Hum Mol Genet* 10, 2143-2155.
- S14 Jansen, G., *et al.* (1996) Abnormal myotonic dystrophy protein kinase levels produce only mild myopathy in mice. *Nat Genet* 13, 316-324.
- S15 Reddy, S., *et al.* (1996) Mice lacking the myotonic dystrophy protein kinase develop a late onset progressive myopathy. *Nat Genet* 13, 325-335.
- S16 Sarkar, P.S., *et al.* (2000) Heterozygous loss of Six5 in mice is sufficient to cause ocular cataracts. *Nat Genet* 25, 110-114.
- S17 Klesert, T.R., *et al.* (2000) Mice deficient in Six5 develop cataracts: implications for myotonic dystrophy. *Nat Genet* 25, 105-109
- S18 O'Coilain, D.F., *et al.* (2004) Transgenic overexpression of human DMPK accumulates into hypertrophic cardiomyopathy, myotonic myopathy and hypotension traits of myotonic dystrophy. *Hum Mol Genet* 13, 2505-2518
- S19 Mankodi, A., *et al.* (2000) Myotonic dystrophy in transgenic mice expressing an expanded CUG repeat. *Science* 289, 1769-1773.
- S20 Gomes-Pereira, M., *et al.* (2007) CTG trinucleotide repeat "big jumps": large expansions, small mice. *PLoS Genet* 3, e52
- S21 Seznec, H., *et al.* (2001) Mice transgenic for the human myotonic dystrophy region with expanded CTG repeats display muscular and brain abnormalities. *Hum Mol Genet* 10, 2717-2726.

S22 Vignaud, A., *et al.* (2010) Progressive skeletal muscle weakness in transgenic mice expressing CTG expansions is associated with the activation of the ubiquitin-proteasome pathway. *Neuromuscul Disord* 20, 319-325

S23 Gourdon, G., *et al.* (2009) The DMSXL transgenic mice carrying very large expansions exhibit molecular and physiological defects: an animal model for gene therapy experiments? In *IDMC7*

S24 Panaite, P.A., *et al.* (2008) Myotonic dystrophy transgenic mice exhibit pathologic abnormalities in diaphragm neuromuscular junctions and phrenic nerves. *J Neuropath Exp Neur* 67, 763-772

S25 Wang, G.S., *et al.* (2007) Elevation of RNA-binding protein CUGBP1 is an early event in an inducible heart-specific mouse model of myotonic dystrophy. *J Clin Invest* 117, 2802-2811

S26 Orengo, J.P., *et al.* (2008) Expanded CTG repeats within the DMPK 3' UTR causes severe skeletal muscle wasting in an inducible mouse model for myotonic dystrophy. *Proc Natl Acad Sci U S A* 105, 2646-2651

S27 Kuyumcu-Martinez, N.M., *et al.* (2007) Increased steady-state levels of CUGBP1 in myotonic dystrophy 1 are due to PKC-mediated hyperphosphorylation. *Mol Cell* 28, 68-78

S28 Mahadevan, M.S., *et al.* (2006) Reversible model of RNA toxicity and cardiac conduction defects in myotonic dystrophy. *Nat Genet* 38, 1066-1070

S29 Storbeck, C.J., *et al.* (2004) Inhibition of myogenesis in transgenic mice expressing the human DMPK 3'-UTR. *Hum Mol Genet* 13, 589-600

S30 Matynia, A., *et al.* (2010) Muscleblind1, but not Dmpk or Six5, contributes to a complex phenotype of muscular and motivational deficits in mouse models of myotonic dystrophy. *PLoS One* 5, e9857

S31 Hao, M., *et al.* (2008) Muscleblind-like 2 (Mbnl2) -deficient mice as a model for myotonic dystrophy. *Dev Dyn* 237, 403-410

S32 Timchenko, N.A., *et al.* (2004) Overexpression of CUG triplet repeat-binding protein, CUGBP1, in mice inhibits myogenesis. *J Biol Chem* 279, 13129-13139

S33 Ho, T.H., *et al.* (2005) Transgenic mice expressing CUG-BP1 reproduce splicing mis-regulation observed in myotonic dystrophy. *Hum Mol Genet* 14, 1539-1547

S34 Koshelev, M., *et al.* (2010) Heart-specific overexpression of CUGBP1 reproduces functional and molecular abnormalities of myotonic dystrophy type 1. *Hum Mol Genet* 19, 1066-1075

S35 Ward, A.J., *et al.* (2010) CUGBP1 overexpression in mouse skeletal muscle reproduces features of myotonic dystrophy type 1. *Hum Mol Genet* 19, 3614-3622

S36 Monckton, D.G., *et al.* (1997) Hypermutable myotonic dystrophy CTG repeats in transgenic mice. *Nat Genet* 15, 193-196

S37 Fortune, M.T., *et al.* (2000) Dramatic, expansion-biased, age-dependent, tissue-specific somatic mosaicism in a transgenic mouse model of triplet repeat instability. *Hum Mol Genet* 9, 439-445

S38 van Den Broek, W.J., *et al.* (2002) Somatic expansion behaviour of the (CTG)(n) repeat in myotonic dystrophy knock-in mice is differentially affected by Msh3 and Msh6 mismatch-repair proteins. *Hum Mol Genet* 11, 191-198.

S39 Chen, W., *et al.* (2003) The zinc-finger protein CNBP is required for forebrain formation in the mouse. *Development* 130, 1367-1379

S40 Chen, W., *et al.* (2007) Haploinsufficiency for Znf9 in Znf9+/- mice is associated with multiorgan abnormalities resembling myotonic dystrophy. *J Mol Biol* 368, 8-17

S41 Salisbury, E., *et al.* (2009) Expression of RNA CUG repeats dysregulates translation and degradation of proteins in myotonic dystrophy 2 patients. *Am J Pathol* 175, 748-762
